# Supplementary material for: Fecal Bile Acids Profile of Crewmembers Consuming the Same Space Food in a Spacecraft Simulator
Source: Front Physiol. 2021 Oct 1;12:593226. doi: 10.3389/fphys.2021.593226 (PMC8517451; doi:10.3389/fphys.2021.593226)
Supplement: Supplementary file 8 [file Table_2.pdf]

Table S2 Summary of prepackaged food items of the scheduled 7 days periodic recipes

| Meal      | Food category               | Day1                               | Day2                                        | Day3                                   | Day4                                          | Day5                                     | Day6                                        | Day7                                   |
|-----------|-----------------------------|------------------------------------|---------------------------------------------|----------------------------------------|-----------------------------------------------|------------------------------------------|---------------------------------------------|----------------------------------------|
| Breakfast | Staple food                 | Purple rice porridge               | Millet porridge                             | Corn porridge                          | Buckwheat porridge                            | Rice porridge                            | Millet porridge                             | Corn porridge                          |
|           | Ready to eat food           | Coconut Bread                      | Sweet bread                                 | Flowers sandwich bread                 | Baked Cake                                    | Coconut bread                            | Sweet bread                                 | Flower sandwich bread                  |
|           | Non-staple food             | Stewed Pleurotus eryngii           | Capsicum potato                             | Stir-fried mushroom with minced meat   | Spicy sea cabbage                             | Spicy Fennel peanut                      | Vegetarian fried Yam, fungus and celery     | Stewed ballonflower                    |
|           | Ready to eat food           | Spiced egg                         | Spiced quail eggs                           | Spiced egg                             | Spiced quail eggs                             | Spiced egg                               | Spiced quail eggs                           | Spiced egg                             |
|           | Condiment                   | Pickled mustard tuber              | Pickled turnip                              | Pickled mustard tubermustard tuber     | Pickled turnip                                | Pickled mustard tuber                    | Pickled turnip                              | Pickled mustard tuber                  |
| Lunch     | Condiment                   | Blueberry sauce                    | Ketchup                                     | Blueberry sauce                        | Ketchup                                       | Blueberry sauce                          | Ketchup                                     | Blueberry sauce                        |
|           | Staple food                 | Steamed rice                       | Stir-Fried Rice with Meat and Vegetables    | Stir-Fried Rice with Soy Sauce         | Steamed rice                                  | Stir-Fried Rice with Meat and Vegetables | Stir-Fried Rice with Soy Sauce              | Steamed rice                           |
|           |                             | Vegetarian rice-flour noodles      | Sesame rice cake                            | Zongzi                                 | Assorted rice                                 | Vegetarian rice-flour noodles            | Sesame rice cake                            | Zongzi                                 |
|           | Non-staple food             | Hot and sour Bamboo shoot slice    | Stir-Fried Pine nuts and corn               | Spicy kelp                             | Oil stewed bamboo shoots                      | Sweet beans                              | Stir-Fried Lettuce and Pleurotus eryngii    | Fresh spicy chayote                    |
|           |                             | Stir-Fried Black pepper beef strip | Braise potato and beef                      | Braised Pork chops                     | Stir-Fried Fungus with meat strip             | Cooked Spicy lamb meat                   | Stir-Fried Cabbage with rabbit meat         | Bitterned Donkey meat                  |
| Supper    | Rehydration vegetable soups | Tomato and egg soup                | Seaweed and egg soup                        | Wild mushroom hibiscus soup            | Fresh fragrant mushroom soup                  | Cabbage beef soup                        | Cabbage and tofu soup                       | Fresh vegetable chicken soup           |
|           | Condiment                   | Sweet chili sauce                  | Garlic sauce                                | Sweet chili sauce                      | Garlic sauce                                  | Sweet chili sauce                        | Garlic sauce                                | Sweet chili sauce                      |
|           | Staple food                 | Fried noodles with Radish and ham  | Fried noodles with Bamboo shoots and pork   | Fried noodles with Radish and ham      | Fried noodles with Bamboo shoots and pork     | Fried noodles with Radish and ham        | Fried noodles with Bamboo shoots and pork   | Fried noodles with Radish and ham      |
|           |                             | Green onion pancake                | Rice cake                                   | Rice cake                              | Salty cake                                    | Green onion pancake                      | Steamed Pork Dumplings                      | Steamed Pork Dumplings                 |
|           | Non-staple food             | Fried water bamboo with Bacon      | Stir-Fried Homemade tofu                    | Stir-Fried Eleocharis dulcis with tofu | Stir-Fried Vigna unguiculata with Minced meat | Stir-Fried Delicious kale                | Stir-Fried Burdock with carrot              | Honey stewed sun fruit                 |
| Snacks    |                             | Braised Bazhen chicken             | Braised Milky chicken with corn kernels     | Roast chicken leg                      | Stir-Fried Carrot with duck                   | Spicy duck meat                          | Spicy pigeon meat                           | Braised goose meat with Pepper         |
|           | Rehydration vegetable       | Freeze-dried Shrimp with canola    | Freeze-dried Chrysanthemum with Chicken oil | Freeze-dried Oyster sauce with lettuce | Freeze-dried salty spinach                    | Freeze-dried Sauced Lactuca sativa L.    | Freeze-dried Chrysanthemum with Chicken oil | Freeze-dried Oyster sauce with lettuce |
|           | Condiment                   | Spicy sauce                        | Seafood sauce                               | Spicy sauce                            | Seafood sauce                                 | Spicy sauce                              | Seafood sauce                               | Spicy sauce                            |
|           |                             | Grain biscuit                      | Crisp biscuit                               | Compressed biscuits with Almond        | Compressed biscuits with Cocoa                | Grain biscuit                            | Crisp biscuit                               | Moon cake                              |
|           | Ready to eat food           | Stir-fried shrimp                  | Spicy pork meat                             | Stewed goose meat                      | Spicy tuna                                    | Bittern Chicken gizzard                  | Spiced flounder                             | Spiced beef                            |
| Snacks    |                             | Canned apple                       | Canned pineapple                            | Canned fruits                          | Canned apple                                  | Canned pineapple                         | Canned fruits                               | Canned apple                           |
|           |                             | Spiced dried bean                  | /                                           | Spicy dried bean curd                  | /                                             | Cheese                                   | /                                           | Milled Red bean and coix seed          |
|           |                             | Peanut and almond                  | Chocolate                                   | Peanut and almond                      | Chocolate                                     | Peanut and almond                        | Chocolate                                   | Peanut and almond                      |
|           | Rehydration drink           | Orange juice                       | Mango juice                                 | Pineapple juice                        | Lemon juice                                   | Peach juice                              | Apple juice                                 | Black tea                              |
