# Supplementary material for: Fecal Bile Acids Profile of Crewmembers Consuming the Same Space Food in a Spacecraft Simulator
Source: Front Physiol. 2021 Oct 1;12:593226. doi: 10.3389/fphys.2021.593226 (PMC8517451; doi:10.3389/fphys.2021.593226)
Supplement: Supplementary file 9 [file Table_3.pdf]

Table S3 List of the 16 kinds of bile acids investigated in this study

| No. | BAs                        | Acronyms | Forms         |
|-----|----------------------------|----------|---------------|
| 1   | Chenodeoxycholic acid      | CDCA     | Primary BA    |
| 2   | Cholic acid                | CA       | Primary BA    |
| 3   | Ursocholic acid            | UCA      | Secondary BA  |
| 4   | Lithocholic acid           | LCA      | Secondary BA  |
| 5   | Deoxycholic acid           | DCA      | Secondary BA  |
| 6   | Ursodeoxycholic acid       | UDCA     | Secondary BA  |
| 7   | Glycolithocholic acid      | GLCA     | Conjugated BA |
| 8   | Glycochenodeoxycholic acid | GCDCA    | Conjugated BA |
| 9   | Tauroursodeoxycholic acid  | TUDCA    | Conjugated BA |
| 10  | Taurolithocholic acid      | TLCA     | Conjugated BA |
| 11  | Taurodeoxycholic acid      | TDCA     | Conjugated BA |
| 12  | Taurocholic acid           | TCA      | Conjugated BA |
| 13  | Taurochenodeoxycholic acid | TCDCA    | Conjugated BA |
| 14  | Glycocholic acid           | GCA      | Conjugated BA |
| 15  | Glycoursodeoxycholic acid  | GUDCA    | Conjugated BA |
| 16  | Glycodeoxycholic acid      | GDCA     | Conjugated BA |
