# Supplementary material for: Fecal Bile Acids Profile of Crewmembers Consuming the Same Space Food in a Spacecraft Simulator
Source: PubMed Central journal article supplement (PMC8517451; doi:10.3389/fphys.2021.593226), 2021-10-01
Supplement: Table_1.pdf [file Table_1.pdf]

Table S1 Major information of crewmembers and proportion of energy supply of the scheduled periodic diet

| Crewmembers | Age | BMI (kg/m <sup>2</sup> ) <sup>1</sup> | Portion of energy supply (% kcal) (Mean ±SD) <sup>2</sup> |          |              |
|-------------|-----|---------------------------------------|-----------------------------------------------------------|----------|--------------|
|             |     |                                       | Protein                                                   | Fat      | Carbohydrate |
| 01          | 28  | 23.6 (23.0)                           | 16.4±1.1                                                  | 31.8±1.0 | 51.6±1.5     |
| 02          | 32  | 25.0 (24.3)                           | 16.6±1.5                                                  | 30.9±0.4 | 52.4±1.5     |
| 03          | 30  | 25.2 (24.6)                           | 16.9±1.0                                                  | 31.6±0.5 | 51.6±0.9     |

1 Body mass index (BMI) the day thirty days before entry and the extravehicular day (value in the brackets)

2 Average proportion of energy supply of the scheduled periodic diet
